# Supplementary material
Source: Springer Nature journal article supplement (https://www.springermedizin.de/resource/supplementary/12933_2011_428_MOESM7_ESM.pdf/9538650)

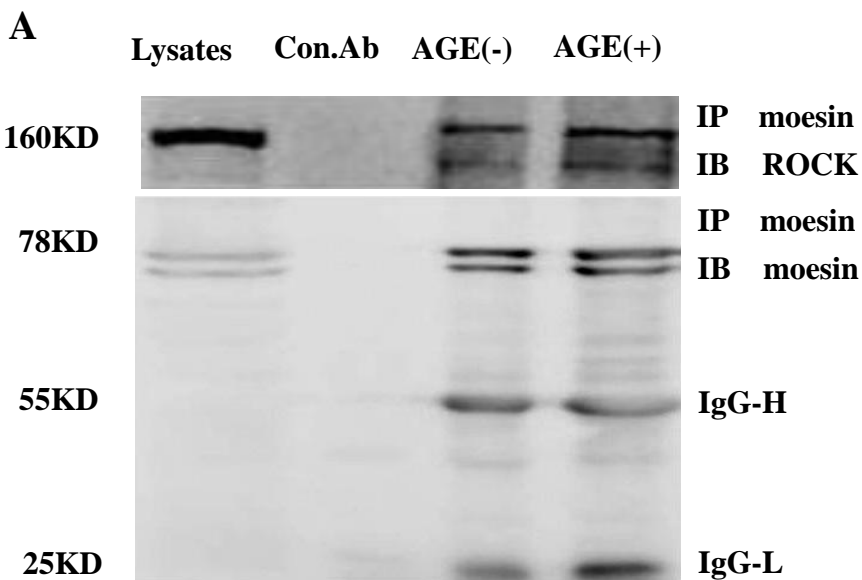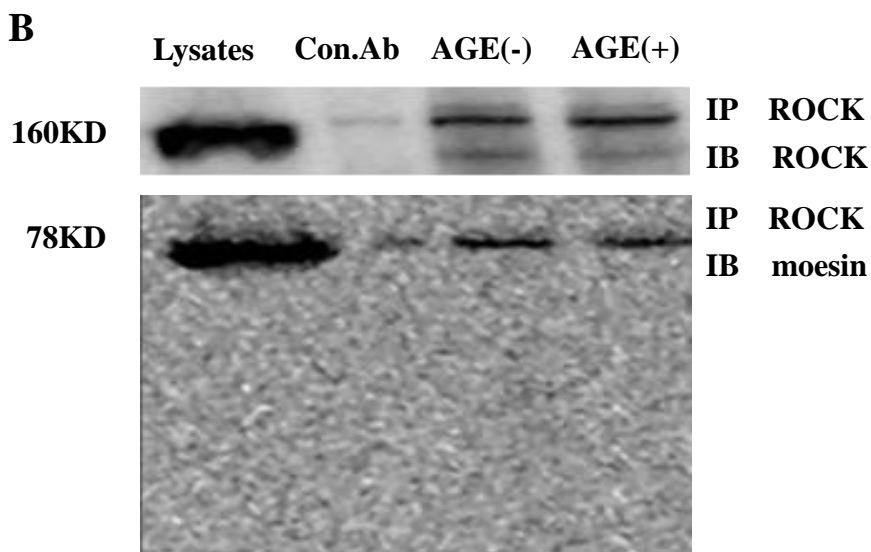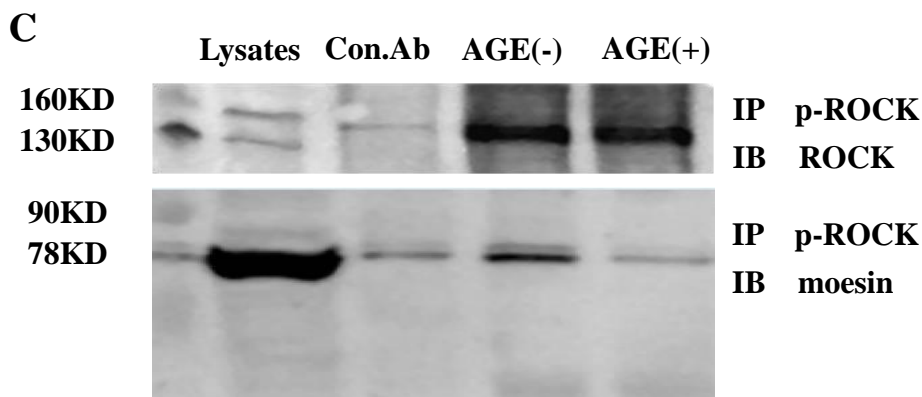

Supplement: MOESM7 [file 9538650]
